# Supplementary material for: Cognitive Reserve in Early Manifest Huntington Disease Patients: Leisure Time Is Associated with Lower Cognitive and Functional Impairment
Source: MDPI journal article supplement (doi:10.3390/jpm12010036), 2022-01-03
Supplement: s1 [file s1]

**Table S1:** CAG expansion in our study sample

| <b>No.</b> | <b>Subject ID</b> | <b>Enroll-HD Centres</b> | <b>CAG expansion</b> |
|------------|-------------------|--------------------------|----------------------|
| 1          | HD-3              | LIRH Foundation Rome     | 44                   |
| 2          | HD-4              | LIRH Foundation Rome     | 46                   |
| 3          | HD-5              | LIRH Foundation Rome     | 46                   |
| 4          | HD-6              | LIRH Foundation Rome     | 43                   |
| 5          | HD-7              | LIRH Foundation Rome     | 48                   |
| 6          | HD-9              | LIRH Foundation Rome     | 43                   |
| 7          | HD-13             | LIRH Foundation Rome     | 49                   |
| 8          | HD-14             | LIRH Foundation Rome     | 44                   |
| 9          | HD-15             | LIRH Foundation Rome     | 43                   |
| 10         | HD-16             | LIRH Foundation Rome     | 42                   |
| 11         | HD-17             | LIRH Foundation Rome     | 45                   |
| 12         | HD-19             | LIRH Foundation Rome     | 44                   |
| 13         | HD-21             | LIRH Foundation Rome     | 41                   |
| 14         | HD-22             | LIRH Foundation Rome     | 41                   |
| 15         | HD-24             | LIRH Foundation Rome     | 42                   |
| 16         | HD-25             | LIRH Foundation Rome     | 42                   |
| 17         | HD-27             | LIRH Foundation Rome     | 43                   |
| 18         | HD-28             | LIRH Foundation Rome     | 46                   |
| 19         | HD-29             | LIRH Foundation Rome     | 41                   |
| 20         | HD-32             | LIRH Foundation Rome     | 43                   |
| 21         | HD-33             | LIRH Foundation Rome     | 43                   |
| 22         | HD-34             | LIRH Foundation Rome     | 49                   |
| 23         | HD-36             | LIRH Foundation Rome     | 44                   |
| 24         | HD-37             | LIRH Foundation Rome     | 44                   |
| 25         | HD-38             | LIRH Foundation Rome     | 43                   |
| 26         | HD-39             | LIRH Foundation Rome     | 42                   |

|    |       |                      |    |
|----|-------|----------------------|----|
| 27 | HD-42 | LIRH Foundation Rome | 41 |
| 28 | HD-45 | LIRH Foundation Rome | 45 |
| 29 | HD-46 | LIRH Foundation Rome | 44 |
| 30 | HD-50 | LIRH Foundation Rome | 41 |
| 31 | HD-51 | LIRH Foundation Rome | 45 |
| 32 | HD-52 | LIRH Foundation Rome | 42 |
| 33 | HD-53 | LIRH Foundation Rome | 44 |
| 34 | HD-56 | LIRH Foundation Rome | 47 |
| 35 | HD-57 | LIRH Foundation Rome | 47 |
| 36 | HD-58 | LIRH Foundation Rome | 45 |
| 37 | HD-60 | LIRH Foundation Rome | 44 |
| 38 | HD-62 | LIRH Foundation Rome | 47 |
| 39 | HD-63 | LIRH Foundation Rome | 44 |
| 40 | HD-65 | LIRH Foundation Rome | 41 |
| 41 | HD-66 | LIRH Foundation Rome | 45 |
| 42 | HD-67 | LIRH Foundation Rome | 45 |
| 43 | HD-69 | LIRH Foundation Rome | 43 |
| 44 | HD-71 | LIRH Foundation Rome | 44 |
| 45 | HD-73 | LIRH Foundation Rome | 47 |
| 46 | HD-74 | LIRH Foundation Rome | 48 |
| 47 | HD-76 | LIRH Foundation Rome | 45 |
| 48 | HD-77 | LIRH Foundation Rome | 44 |
| 49 | HD-78 | LIRH Foundation Rome | 44 |
| 50 | HD-79 | LIRH Foundation Rome | 42 |
| 51 | HD-80 | LIRH Foundation Rome | 49 |
| 52 | HD-81 | LIRH Foundation Rome | 43 |
| 53 | HD-82 | LIRH Foundation Rome | 44 |
| 54 | HD-83 | LIRH Foundation Rome | 40 |
| 55 | HD-84 | LIRH Foundation Rome | 46 |
| 56 | HD-85 | LIRH Foundation Rome | 41 |

|                                   |        |                                 |                |
|-----------------------------------|--------|---------------------------------|----------------|
| 57                                | HD-86  | IRCCS Besta Milan               | 40             |
| 58                                | HD-87  | IRCCS Besta Milan               | 40             |
| 59                                | HD-89  | IRCCS Besta Milan               | 41             |
| 60                                | HD-91  | IRCCS Besta Milan               | 43             |
| 61                                | HD-92  | IRCCS Besta Milan               | 43             |
| 62                                | HD-93  | IRCCS Besta Milan               | 40             |
| 63                                | HD-94  | Sant'Andrea University Hospital | 44             |
| 64                                | HD-95  | Sant'Andrea University Hospital | 42             |
| 65                                | HD-96  | Sant'Andrea University Hospital | 43             |
| 66                                | HD-97  | Sant'Andrea University Hospital | 42             |
| 67                                | HD-98  | Sant'Andrea University Hospital | 42             |
| 68                                | HD-99  | Sant'Andrea University Hospital | 44             |
| 69                                | HD-100 | Sant'Andrea University Hospital | 45             |
| 70                                | HD-101 | Sant'Andrea University Hospital | 41             |
| 71                                | HD-102 | Sant'Andrea University Hospital | 45             |
| 72                                | HD-103 | Sant'Andrea University Hospital | 45             |
| 73                                | HD-104 | Sant'Andrea University Hospital | 42             |
| 74                                | HD-105 | Sant'Andrea University Hospital | 47             |
| 75                                | HD-106 | Sant'Andrea University Hospital | 40             |
| Mean repeat<br>number ( $\pm$ SD) |        |                                 | 43,7 $\pm$ 2.3 |

**Table S2:** Correlations between CAG expansions and clinical variables

| CLINICAL<br>VARIABLES | CAG expansion |              |
|-----------------------|---------------|--------------|
|                       | <i>r</i>      | <i>p</i>     |
| CRIq_Edu              | -0,348        | <b>0,002</b> |
| CRIq_WA               | -0,320        | <b>0,005</b> |
| CRIq_LA               | -0,219        | 0,059        |
| CRIq_Tot              | -0,372        | <b>0,001</b> |
| ΔTFC                  | -0,008        | 0,946        |
| ΔTMS                  | -0,088        | 0,454        |
| cUHDRS_t0             | -0,040        | 0,736        |
| cUHDRS_t1             | -0,035        | 0,764        |
| cUHDRS_t2             | -0,039        | 0,738        |

CRIq\_Edu: Cognitive Reserve Index Educational; CRIq\_WA: Cognitive Reserve Index Working activity; CRIq\_LA: Cognitive Reserve Index Leisure activities; CRIq\_Tot: Cognitive Reserve Index Total score; ΔTFC: the difference between the Total Functional Capacity score at t2 and t0; ΔTMS: the difference between the Total Motor Score at t2 and t0; cUHDRS\_t0: composite Unified Huntington's Disease Rating Scale at baseline; cUHDRS\_t1: composite Unified Huntington's Disease Rating Scale at 1-year follow-up; cUHDRS\_t2: composite Unified Huntington's Disease Rating Scale at 2-year follow-up.

**Table S3:** Correlations between CAG expansions and cognitive variables at three timepoints

| COGNITIVE TEST |      | CAG expansion |          |
|----------------|------|---------------|----------|
|                |      | <i>r</i>      | <i>p</i> |
| BASELINE       | MMSE | -0,020        | 0,865    |
|                | SDMT | 0,054         | 0,647    |
|                | VFT  | -0,102        | 0,382    |
|                | SCR  | -0,004        | 0,974    |
|                | SWR  | -0,018        | 0,876    |
| I follow-up    | MMSE | 0,030         | 0,797    |
|                | SDMT | 0,051         | 0,665    |
|                | VFT  | -0,027        | 0,817    |
|                | SCR  | 0,006         | 0,963    |
|                | SWR  | -0,019        | 0,874    |
| II follow-up   | MMSE | -0,1          | 0,397    |
|                | SDMT | -0,013        | 0,914    |
|                | VFT  | -0,126        | 0,280    |
|                | SCR  | 0,052         | 0,655    |
|                | SWR  | -0,026        | 0,824    |

MMSE: Mini Mental State Examination; SDMT: Symbol Digit Modality Test; VFT: Categorical Verbal Fluency Test; SCR: Stroop Color Reading Test; SWR: Stroop Word Reading Test.

**Table S4.1:** Clinical and cognitive scores in impaired and normal cognitive reserve total index groups.

|                                                                     |               | <b>CRIq_Tot<br/>impaired Group<br/>(n=32)<br/>Mean <math>\pm</math> SE</b> | <b>CRIq_Tot<br/>normal Group<br/>(n=43)<br/>Mean <math>\pm</math> SE</b> | <b>p</b> |
|---------------------------------------------------------------------|---------------|----------------------------------------------------------------------------|--------------------------------------------------------------------------|----------|
| <b>Clinical<br/>variables</b>                                       | $\Delta$ _TFC | -1.69 $\pm$ 0.2                                                            | -1.33 $\pm$ 0.23                                                         | 0.311    |
|                                                                     | $\Delta$ _TMS | 10.5 $\pm$ 1.39                                                            | 7.44 $\pm$ 1.48                                                          | 0.149    |
|                                                                     | cUHDRS_t0     | 73.24 $\pm$ 8.5                                                            | 85.27 $\pm$ 7.47                                                         | 0.293    |
|                                                                     | cUHDRS_t1     | 62.84 $\pm$ 8.84                                                           | 77.55 $\pm$ 8.14                                                         | 0.229    |
|                                                                     | cUHDRS_t2     | 49.96 $\pm$ 9.72                                                           | 69.15 $\pm$ 9.20                                                         | 0.162    |
| <b>Cognitive<br/>variables</b><br>-<br><i>Baseline</i>              | MMSE          | 25.53 $\pm$ 0.5                                                            | 27.01 $\pm$ 0.4                                                          | 0.069    |
|                                                                     | SDMT          | 23.03 $\pm$ 2.26                                                           | 26.55 $\pm$ 2.06                                                         | 0.257    |
|                                                                     | VFT           | 13.4 $\pm$ 1.01                                                            | 14.37 $\pm$ 0.73                                                         | 0.431    |
|                                                                     | SCR           | 47.21 $\pm$ 2.86                                                           | 50.69 $\pm$ 2.81                                                         | 0.399    |
|                                                                     | SWR           | 65 $\pm$ 4.1                                                               | 73.39 $\pm$ 3.76                                                         | 0.140    |
| <b>Cognitive<br/>variables</b><br>-<br><i>1 year<br/>follow-up</i>  | MMSE          | 24.87 $\pm$ 0.66                                                           | 26.04 $\pm$ 0.48                                                         | 0.064    |
|                                                                     | SDMT          | 22.41 $\pm$ 2.37                                                           | 25.64 $\pm$ 2.09                                                         | 0.314    |
|                                                                     | VFT           | 12.31 $\pm$ 1.15                                                           | 14.53 $\pm$ 0.77                                                         | 0.101    |
|                                                                     | SCR           | 43.25 $\pm$ 2.62                                                           | 49.23 $\pm$ 2.99                                                         | 0.153    |
|                                                                     | SWR           | 61.37 $\pm$ 3.91                                                           | 70.67 $\pm$ 3.96                                                         | 0.107    |
| <b>Cognitive<br/>variables</b><br>-<br><i>2 years<br/>follow-up</i> | MMSE          | 24.16 $\pm$ 0.73                                                           | 26.04 $\pm$ 0.45                                                         | 0.067    |
|                                                                     | SDMT          | 21.28 $\pm$ 2.06                                                           | 24.98 $\pm$ 2.35                                                         | 0.261    |
|                                                                     | VFT           | 11.65 $\pm$ 0.87                                                           | 13.18 $\pm$ 0.71                                                         | 0.176    |
|                                                                     | SCR           | 42.46 $\pm$ 3.54                                                           | 47.23 $\pm$ 3.1                                                          | 0.316    |
|                                                                     | SWR           | 55.66 $\pm$ 4.46                                                           | 67.63 $\pm$ 4.19                                                         | 0.067    |

**Table S4.2:** Clinical and cognitive scores in impaired and normal cognitive reserve education groups

|                                                                     |                  | <b>CRIq_Edu<br/>impaired Group<br/>(n=14)<br/>Mean ± SE</b> | <b>CRIq_Edu<br/>normal Group<br/>(n=61)<br/>Mean ± SE</b> | <b>p</b> |
|---------------------------------------------------------------------|------------------|-------------------------------------------------------------|-----------------------------------------------------------|----------|
| <b>Clinical<br/>variables</b>                                       | $\Delta\_TFC$    | -1.64 ± 0.34                                                | -1.44 ± 0.20                                              | 0.659    |
|                                                                     | $\Delta\_TMS$    | 9.14 ± 1.69                                                 | 8.66 ± 1.22                                               | 0.857    |
|                                                                     | <b>cUHDRS_t0</b> | 77.07 ± 15.01                                               | 80.848 ± 6.05                                             | 0.796    |
|                                                                     | <b>cUHDRS_t1</b> | 73.14 ± 15.58                                               | 70.848 ± 6.55                                             | 0.883    |
|                                                                     | <b>cUHDRS_t2</b> | 61.28 ± 16.56                                               | 60.898 ± 7.46                                             | 0.982    |
| <b>Cognitive<br/>variables</b><br>-<br><i>Baseline</i>              | <b>MMSE</b>      | 25.84 ± 0.91                                                | 26.59 ± 0.34                                              | 0.385    |
|                                                                     | <b>SDMT</b>      | 26.21 ± 4.1                                                 | 24.78 ± 1.64                                              | 0.719    |
|                                                                     | <b>VFT</b>       | 13.5 ± 1.66                                                 | 14.06 ± 0.64                                              | 0.717    |
|                                                                     | <b>SCR</b>       | 47.85 ± 4.3                                                 | 49.52 ± 2.29                                              | 0.751    |
|                                                                     | <b>SWR</b>       | 66.5 ± 6.41                                                 | 70.57 ± 3.13                                              | 0.575    |
| <b>Cognitive<br/>variables</b><br>-<br><i>1 year<br/>follow-up</i>  | <b>MMSE</b>      | 24.92 ± 1.22                                                | 25.96 ± 0.41                                              | 0.319    |
|                                                                     | <b>SDMT</b>      | 25.57 ± 4.12                                                | 23.96 ± 1.68                                              | 0.690    |
|                                                                     | <b>VFT</b>       | 11.92 ± 2.07                                                | 13.96 ± 0.67                                              | 0.238    |
|                                                                     | <b>SCR</b>       | 45.64 ± 4.39                                                | 46.91 ± 2.34                                              | 0.812    |
|                                                                     | <b>SWR</b>       | 67.42 ± 6.33                                                | 66.54 ± 3.21                                              | 0.904    |
| <b>Cognitive<br/>variables</b><br>-<br><i>2 years<br/>follow-up</i> | <b>MMSE</b>      | 24.84 ± 1.21                                                | 25.623 ± 0.44                                             | 0.488    |
|                                                                     | <b>SDMT</b>      | 24.5 ± 3.89                                                 | 23.15 ± 1.79                                              | 0.747    |
|                                                                     | <b>VFT</b>       | 11.85 ± 1.59                                                | 12.68 ± 0.58                                              | 0.565    |
|                                                                     | <b>SCR</b>       | 46.21 ± 4.55                                                | 44.96 ± 2.68                                              | 0.837    |
|                                                                     | <b>SWR</b>       | 63.21 ± 6.84                                                | 62.36 ± 3.53                                              | 0.916    |

**Table S4.3:** Clinical and cognitive scores in impaired and normal cognitive reserve working activity index groups.

|                                                                     |               | CRIq_WA<br>impaired Group<br>(n=29)<br>Mean $\pm$ SE | CRIq_WA<br>normal Group<br>(n=46)<br>Mean $\pm$ SE | p     |
|---------------------------------------------------------------------|---------------|------------------------------------------------------|----------------------------------------------------|-------|
| <b>Clinical<br/>variables</b>                                       | $\Delta$ _TFC | -1.52 $\pm$ 0.28                                     | -1.46 $\pm$ 0.22                                   | 0.867 |
|                                                                     | $\Delta$ _TMS | 10.14 $\pm$ 1.71                                     | 7.87 $\pm$ 1.31                                    | 0.293 |
|                                                                     | cUHDRS_t0     | 76.92 $\pm$ 9.31                                     | 82.17 $\pm$ 7.1                                    | 0.652 |
|                                                                     | cUHDRS_t1     | 69.2 $\pm$ 9.73                                      | 72.58 $\pm$ 7.74                                   | 0.786 |
|                                                                     | cUHDRS_t2     | 54.78 $\pm$ 10.93                                    | 64.86 $\pm$ 8.64                                   | 0.471 |
| <b>Cognitive<br/>variables</b><br>-<br><i>Baseline</i>              | MMSE          | 25.67 $\pm$ 0.55                                     | 26.95 $\pm$ 0.38                                   | 0.067 |
|                                                                     | SDMT          | 24.1 $\pm$ 2.59                                      | 25.65 $\pm$ 1.9                                    | 0.625 |
|                                                                     | VFT           | 14.89 $\pm$ 1.04                                     | 13.37 $\pm$ 0.72                                   | 0.219 |
|                                                                     | SCR           | 51.69 $\pm$ 3.49                                     | 47.65 $\pm$ 2.45                                   | 0.335 |
|                                                                     | SWR           | 68.44 $\pm$ 4.43                                     | 70.67 $\pm$ 3.65                                   | 0.702 |
| <b>Cognitive<br/>variables</b><br>-<br><i>1 year<br/>follow-up</i>  | MMSE          | 25.17 $\pm$ 0.73                                     | 26.15 $\pm$ 0.46                                   | 0.239 |
|                                                                     | SDMT          | 23.65 $\pm$ 2.59                                     | 24.68 $\pm$ 1.99                                   | 0.752 |
|                                                                     | VFT           | 13.31 $\pm$ 1.13                                     | 13.76 $\pm$ 0.83                                   | 0.746 |
|                                                                     | SCR           | 47.37 $\pm$ 3.34                                     | 46.23 $\pm$ 2.65                                   | 0.790 |
|                                                                     | SWR           | 66.17 $\pm$ 4.26                                     | 67.04 $\pm$ 3.83                                   | 0.883 |
| <b>Cognitive<br/>variables</b><br>-<br><i>2 years<br/>follow-up</i> | MMSE          | 24.57 $\pm$ 0.78                                     | 26.04 $\pm$ 0.47                                   | 0.092 |
|                                                                     | SDMT          | 22.03 $\pm$ 2.63                                     | 24.26 $\pm$ 2.06                                   | 0.506 |
|                                                                     | VFT           | 12.31 $\pm$ 1                                        | 12.67 $\pm$ 0.66                                   | 0.753 |
|                                                                     | SCR           | 43.79 $\pm$ 3.75                                     | 46.08 $\pm$ 3                                      | 0.636 |
|                                                                     | SWR           | 60.03 $\pm$ 4.89                                     | 64.09 $\pm$ 4.07                                   | 0.531 |



CRIq\_Tot: Cognitive Reserve Index Total score; CRIq\_Edu: Cognitive Reserve Index Educational; CRIq\_WA: Cognitive Reserve Index Working activity;  
 $\Delta$ TFC: the difference between the Total Functional Capacity score at t2 and t0;  $\Delta$ TMS: the difference between the Total Motor Score at t2 and t0;  
cUHDRS\_t0: composite Unified Huntington's Disease Rating Scale at baseline; cUHDRS\_t1: composite Unified Huntington's Disease Rating Scale at 1-year follow-up; cUHDRS\_t2: composite Unified Huntington's Disease Rating Scale at 2-year follow-up.  
MMSE: Mini Mental State Examination; SDMT: Symbol Digit Modality Test; VFT: Categorical Verbal Fluency Test; SCR: Stroop Color Reading Test; SWR: Stroop Word Reading Test.  
SE: standard error; NS: not significant.
